# Supplementary material
Source: publisher figshare collection journal article supplement (https://gsajournals.figshare.com/ndownloader/files/25816550)
Supplement: Supplementary file 1 [file 25816550]

## Sheet: Sheet1
Table S1. List of nematode strains used in this paper.
P. pacificus
Gene symbol	Strain	Allele	Origin
Wild type	PS312		Sommer lab.
Ex[Ppa-egl-20p::Venus, Ppa-ser-1p::RFP]	MOK36	excbh11	This paper
	MOK81	excbh18	This paper
Ex[Ppa-egl-20p::Venus, Ppa-ser-4p::RFP]	MOK66	excbh13	This paper
Ex[Ppa-egl-20p::Venus, Ppa-ser-5p::RFP]	MOK34	excbh9	This paper
	MOK35	excbh10	This paper
Ex[Ppa-egl-20p::Venus, Ppa-ser-7p::RFP]	MOK4	excbh1	This paper
	MOK5	excbh2	This paper
	MOK6	excbh3	This paper
Ex[Ppa-egl-20p::Venus, Ppa-mod-1p::RFP]	MOK69	excbh16	This paper
	MOK70	excbh17	This paper
Ppa-eud-1	RS2561	tu445	Ragsdale et al, 2013.
Ppa-ser-1	MOK3	cbh3	This paper
	MOK80	cbh58	This paper
Ppa-ser-4	MOK21	cbh12	This paper
Ppa-ser-5	MOK20	cbh11	This paper
	MOK33	cbh23	This paper
Ppa-ser-7	MOK1	cbh1	This paper
	MOK2	cbh2	This paper
Ppa-mod-1	MOK12	cbh4	This paper
	MOK13	cbh5	This paper
Ppa-ser-1; Ppa-ser-7	MOK11	cbh3; cbh1	This paper
Ppa-ser-4; Ppa-mod-1	MOK64	cbh12; cbh4	This paper
C. elegans
Gene symbol	Strain	Allele	Reference
Wild type	N2		Brenner, 1974
